# Supplementary material
Source: Springer Nature journal article supplement (https://www.springermedizin.de/resource/supplementary/12950_2011_291_MOESM5_ESM.pdf/9557478)

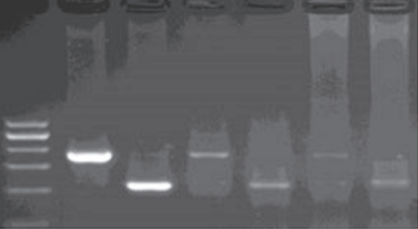

**SP-A1 (365 bp)**

**SP-A2 (212 bp)**

**M      1      2      3      4      5      6**

Supplement: MOESM5 [file 9557478]
